# Supplementary material for: Feature selection and classification for microarray data analysis: Evolutionary methods for identifying predictive genes
Source: Springer Nature journal article supplement (doi:10.1186/1471-2105-6-148), 2005-06-15
Supplement: Additional file 2 [file 1471-2105-6-148-s2.pdf]

## Additional File 2

The 40 top-ranked NCI60 genes ordered by the frequency that the gene is selected.

| Gene Index | Gene Access Number | Frequency | z-score value |
|------------|--------------------|-----------|---------------|
| 3682       | 6291               | 1097      | 2.873         |
| 4491       | 7333               | 1097      | 2.873         |
| 455        | 1029               | 1084      | 2.824         |
| 836        | 1892               | 947       | 2.303         |
| 3957       | 6608               | 916       | 2.185         |
| 3959       | 6610               | 874       | 2.026         |
| 2362       | 4629               | 862       | 1.980         |
| 4378       | 7171               | 724       | 1.456         |
| 1340       | 3070               | 719       | 1.437         |
| 1976       | 4073               | 718       | 1.433         |
| 3105       | 5536               | 707       | 1.391         |
| 1781       | 3763               | 670       | 1.250         |
| 1889       | 3927               | 663       | 1.224         |
| 4368       | 7156               | 654       | 1.189         |
| 5375       | 8454               | 646       | 1.159         |
| 906        | 2059               | 613       | 1.034         |
| 6283       | 9588               | 609       | 1.018         |
| 4413       | 7226               | 585       | 0.927         |
| 726        | 1676               | 574       | 0.885         |
| 5752       | 8937               | 533       | 0.730         |
| 5728       | 8911               | 518       | 0.673         |
| 4241       | 6990               | 508       | 0.635         |
| 4741       | 7676               | 498       | 0.597         |
| 5605       | 8754               | 493       | 0.578         |
| 1619       | 3529               | 481       | 0.532         |
| 6218       | 9521               | 477       | 0.517         |
| 2664       | 4995               | 475       | 0.509         |
| 5826       | 9029               | 463       | 0.463         |
| 2889       | 5272               | 453       | 0.425         |
| 2612       | 4933               | 446       | 0.399         |
| 5666       | 8837               | 409       | 0.258         |
| 5749       | 8934               | 400       | 0.224         |
| 6271       | 9576               | 392       | 0.194         |
| 4480       | 7321               | 386       | 0.171         |
| 2417       | 4700               | 363       | 0.083         |
| 5306       | 8363               | 358       | 0.064         |
| 2907       | 5296               | 357       | 0.061         |
| 5810       | 9009               | 344       | 0.011         |
| 5472       | 8572               | 344       | 0.011         |
| 5378       | 8457               | 343       | 0.007         |
